# Supplementary material for: Predictors of outcome in patients with de novo diagnosis of heart failure with reduced ejection fraction: Role of combined myocardial and lung Iodine-123 Meta-Iodobenzylguanidine imaging
Source: Springer Nature journal article supplement (doi:10.1007/s12350-019-01637-8), 2019-02-13
Supplement: MOESM1 [file 16469370]

**Online supplement to Silverio et al, Predictors of outcome in patients with de novo diagnosis of heart failure with reduced ejection fraction: role of combined myocardial and lung Iodine-123 Meta-Iodobenzylguanidine Imaging**

**Online Resource 1. Medications at enrollment**

| **Drugs** | **N (%)** | **Median doses (mg)** |
| --- | --- | --- |
| ACE inhibitors | N = 54 |  |
| Ramipril | 48 (89.0%) | 10 (7.5-10) |
| Enalapril | 4 (7.4%) | 20 (12.5-30) |
| Lisinopril | 1 (1.8%) | 20 |
| Captopril | 1 (1.8%) | 100 |
| ARBs | N = 23 |  |
| Valsartan | 17 (74.0%) | 80 (80-160) |
| Losartan | 4 (17.4%) | 50 (50-100) |
| Candesartan | 2 (8.6%) | 20 (8-32) |
| Beta-blockers | N = 78 |  |
| Bisoprolol | 53 (68.0%) | 5 (5-10) |
| Carvedilol | 20 (25.6%) | 25 (25-50) |
| Nebivolol | 3 (3.8%) | 5 (5-7.5) |
| Metoprolol | 2 (2.6%) | 100 |
| Diuretics | N = 76 |  |
| Furosemide | 74 (97.4%) | 50 (25-75) |
| Torasemide | 2 (2.6%) | 10 |
| MRAs | N = 46 |  |
| Spironolactone/eplerenone | 6 (13.0%) | 25 (25-50) |
| Canrenone | 40 (87.0%) | 50 (50-75) |
| Amiodarone | N = 12 | 200 |
| Ivabradine | N = 13 | 10 (10-15) |

Doses are reported as median and interquartile range, as appropriate.

ACE, angiotensin-converting enzyme; ARBs, angiotensin receptor blockers; MRA, mineralocorticoid receptor antagonists.

**Online Resource 2. Predictors of HF rehospitalization (N = 84)**

|  | Univariate analysis | | | Multivariate analysis | | |
| --- | --- | --- | --- | --- | --- | --- |
|  | HR | 95% CI | p-value | HR | 95% CI | p-value |
| Age, yrs | 1.008 | 0.978-1.039 | 0.567 |  |  | - |
| Male sex | 0.765 | 0.269-2.177 | 0.615 |  |  | - |
| Height, cm | 0.975 | 0.930-1.022 | 0.285 |  |  | - |
| Weight, kg | 0.989 | 0.962-1,017 | 0.449 |  |  | - |
| BMI, kg/m2 | 0.989 | 0.931-1.051 | 0.727 |  |  | - |
| Hypertension | 1.394 | 0.060-3.206 | 0.434 |  |  | - |
| Diabetes mellitus | 0.927 | 0.413-2.083 | 0.855 |  |  | - |
| Dyslipidemia | 1.081 | 0.450-2.597 | 0.861 |  |  | - |
| Smoking | 1.045 | 0.437-2.500 | 0.921 |  |  | - |
| Chronic kidney disease | 0.923 | 0.399-2.134 | 0.851 |  |  | - |
| Atrial fibrillation | 2.112 | 1.062-4.202 | **0.033** |  |  | - |
| Previous stroke | 0.321 | 0.082-1.256 | 0.103 |  |  | - |
| Ischemic etiology | 1.053 | 0.431-2.576 | 0.909 |  |  | - |
| NT-proBNP, pg/mL | 1.001 | 1.000-1.002 | 0.098 |  |  | - |
| NYHA II | 0.781 | 0.378-1.614 | 0.504 |  |  | - |
| NYHA III | 1.281 | 0.620-2.649 | 0.504 |  |  | - |
| ACE inhibitor | 0.737 | 0.300-1.813 | 0.506 |  |  | - |
| ARB | 0.662 | 0.273-1.607 | 0.362 |  |  | - |
| Beta-blocker | 0.483 | 0.181-1.293 | 0.148 |  |  | - |
| Loop diuretics | 0.377 | 0.048-2.960 | 0.354 |  |  | - |
| Aldosterone antagonist | 0.463 | 0.204-1.049 | 0.065 |  |  | - |
| Amiodarone | 1.083 | 0.388-3.024 | 0.879 |  |  | - |
| LVEF, % | 1.007 | 0.929-1.093 | 0.858 |  |  | - |
| LVEDV, ml | 1.005 | 0.997-1.013 | 0.202 |  |  | - |
| LVESV ml | 1.007 | 0.998-1.016 | 0.117 |  |  | - |
| sPAP, mmHg | 1.049 | 1.008-1.091 | **0.019** | 1.047 | 1.005-1.090 | **0.027** |
| E/e’ ratio | 1.094 | 1.003.1.194 | **0.043** |  |  | - |
| Late H/M* | 0.761 | 0.621-0.932 | **0.008** |  |  | - |
| H/M Washout, % | 1.030 | 1.010-1.051 | **0.004** |  |  | - |
| Late L/M* | 1.200 | 1.022-1.410 | **0.026** |  |  | - |
| L/M Washout, % | 1.013 | 0.990-1.037 | 0.264 |  |  | - |
| Late L/H* | 1.331 | 1.150-1.539 | **<0.001** | 1.341 | 1.149-1.566 | **<0.001** |

*Hazard ratio reflects risk with increases of 0.1.

Abbreviations are reported in Table 1.

**Online Resource 3. Predictors of cardiac death (N = 84)**

|  | Univariate analysis | | | Multivariate analysis | | |
| --- | --- | --- | --- | --- | --- | --- |
|  | HR | 95% CI | p-value | HR | 95% CI | p-value |
| Age, yrs | 1.003 | 0.960-1.048 | 0.898 |  |  | - |
| Male sex | 1.209 | 0.373-3.916 | 0.752 |  |  | - |
| Height, cm | 1.025 | 0.841-1.249 | 0.808 |  |  | - |
| Weight, kg | 0.923 | 0.746-1.143 | 0.464 |  |  | - |
| BMI, kg/m2 | 1.184 | 0.671-2.088 | 0.561 |  |  | - |
| Hypertension | 0.471 | 0.135-1.645 | 0.238 |  |  | - |
| Diabetes mellitus | 1.051 | 0.362-3.050 | 0.328 |  |  | - |
| Dyslipidemia | 1.652 | 0.537-5.081 | 0.381 |  |  | - |
| Smoking | 1.548 | 0.449-5.334 | 0.489 |  |  | - |
| Chronic kidney disease | 0.980 | 0.314-3.063 | 0.973 |  |  | - |
| Atrial fibrillation | 1.851 | 0.730-4.695 | 0.194 |  |  | - |
| Previous stroke | 0.046 | 0.001-619.344 | 0.526 |  |  | - |
| Ischemic etiology | 1.103 | 0.351-3.463 | 0.867 |  |  | - |
| NT-proBNP, pg/mL | 1.001 | 0.999-1.002 | 0.388 |  |  | - |
| NYHA II | 0.469 | 0.185-1.192 | 0.111 |  |  | - |
| NYHA III | 2.133 | 0.839-5.420 | 0.111 |  |  | - |
| ACE inhibitor | 0.752 | 0.297-1.906 | 0.548 |  |  | - |
| ARB | 0.690 | 0.227-2.098 | 0.513 |  |  | - |
| Beta-blocker | 0.348 | 0.100-1.216 | 0.098 |  |  | - |
| Loop diuretics | 1.713 | 0.176-16.662 | 0.643 |  |  | - |
| Aldosterone antagonist | 0.514 | 0.158-1.669 | 0.268 |  |  | - |
| Amiodarone | 0.864 | 0.204-3.667 | 0.843 |  |  | - |
| LVEF, % | 0.880 | 0.790-0.979 | **0.019** |  |  | - |
| LVEDV, ml | 1.015 | 1.004-1.026 | **0.007** |  |  | - |
| LVESV ml | 1.020 | 1.008-1.032 | **0.001** | 1.016 | 1.003-1.029 | 0.017 |
| sPAP, mmHg | 1.067 | 1.011-1.127 | **0.018** | 1.064 | 1.005-1.126 | 0.034 |
| E/e’ ratio | 1.132 | 1.005-1.275 | **0.040** |  |  | - |
| Late H/M* | 0.752 | 0.570-0.991 | **0.043** |  |  | - |
| H/M Washout, % | 1.027 | 0.999-1.057 | 0.063 |  |  | - |
| Late L/M* | 1.237 | 1.007-1.519 | **0.043** |  |  | - |
| L/M Washout, % | 1.008 | 0.976-1.041 | 0.625 |  |  | - |
| Late L/H* | 1.417 | 1.163-1.727 | **0.001** | 1.323 | 1.072-1.633 | 0.009 |

*Hazard ratio reflects risk with increases of 0.1.

Abbreviations are reported in Table 1.

**Online Resource 4. Predictors of all-cause death (N = 84)**

|  | Univariate analysis | | | Multivariate analysis | | |
| --- | --- | --- | --- | --- | --- | --- |
|  | HR | 95% CI | p-value | HR | 95% CI | p-value |
| Age, yrs | 1.023 | 0.984-1.063 | 0.254 |  |  | - |
| Male sex | 1.110 | 0.379-3.252 | 0.849 |  |  | - |
| Height, cm | 0.976 | 0.924-1.032 | 0.390 |  |  | - |
| Weight, kg | 0.980 | 0.949-1.011 | 0.208 |  |  | - |
| BMI, kg/m2 | 0.969 | 0.915-1.027 | 0.295 |  |  | - |
| Hypertension | 0.765 | 0.304-1.929 | 0.571 |  |  | - |
| Diabetes mellitus | 1.674 | 0.743-3.770 | 0.214 |  |  | - |
| Dyslipidemia | 1.081 | 0.480-2.434 | 0.851 |  |  | - |
| Smoking | 2.774 | 0.947-8.122 | 0.063 |  |  | - |
| Chronic kidney disease | 1.771 | 0.793-3.954 | 0.163 |  |  | - |
| Atrial fibrillation | 1.952 | 0.874-4.361 | 0.103 |  |  | - |
| Previous stroke | 0.830 | 0.112-6.153 | 0.856 |  |  | - |
| Ischemic etiology | 0.975 | 0.417-2.278 | 0.953 |  |  | - |
| NT-proBNP, pg/mL | 1.000 | 0.999-1.001 | 0.767 |  |  | - |
| NYHA II | 0.496 | 0.222-1.108 | 0.087 |  |  | - |
| NYHA III | 2.017 | 0.903-4.510 | 0.087 |  |  | - |
| ACE inhibitor | 0.893 | 0.391-2.041 | 0.788 |  |  | - |
| ARB | 0.804 | 0.319-2.027 | 0.644 |  |  | - |
| Beta-blocker | 0.514 | 0.153-1.730 | 0.282 |  |  | - |
| Loop diuretics | 1.272 | 0.299-5.413 | 0.745 |  |  | - |
| Aldosterone antagonist | 0.455 | 0.194-1.068 | 0.071 |  |  | - |
| Amiodarone | 0.884 | 0.263-2.966 | 0.842 |  |  | - |
| LVEF, % | 0.943 | 0.860-1.035 | 0.219 |  |  | - |
| LVEDV, ml | 1.014 | 1.005-1.023 | **0.003** |  |  | - |
| LVESV ml | 1.017 | 1.007-1.028 | **0.001** | 1.013 | 1.002-1.025 | **0.018** |
| sPAP, mmHg | 1.048 | 1.000-1.099 | 0.050 |  |  | - |
| E/e’ ratio | 1.093 | 0.988-1.209 | 0.086 |  |  | - |
| Late H/M* | 0.754 | 0.594-0.958 | **0.021** |  |  | - |
| H/M Washout, % | 1.027 | 1.003-1.053 | **0.029** |  |  | - |
| Late L/M* | 1.194 | 0.999-1.427 | 0.052 |  |  | - |
| L/M Washout, % | 1.013 | 0.986-1.041 | 0.358 |  |  | - |
| Late L/H* | 1.354 | 1.140-1.609 | **0.001** | 1.245 | 1.050-1.477 | **0.012** |

*Hazard ratio reflects risk with increases of 0.1.

Abbreviations are reported in Table 1.

**Online Resource 5. Baseline characteristics according to ischemic or non-ischemic etiology**

| **Variables** | **Ischemic etiology**  **(N = 57)** | **Non-ischemic etiology (N = 27)** | **p-value** |
| --- | --- | --- | --- |
| Age, yrs | 69.0 (61.0-77.0) | 61.0 (54.0-71.0) | **0.003** |
| Male sex, N (%) | 50 (87.7) | 21 (77.8) | 0.239 |
| Height, cm | 166.2±7.0 | 166.8±9.0 | 0.763 |
| Weight, kg | 78.0 (72.0-84.0) | 71.0 (60.0-84.0) | **0.028** |
| BMI, kg/m2 | 27.5±6.4 | 24.7±6.4 | 0.081 |
| Hypertension, N (%) | 46 (80.7) | 14 (51.9) | **0.006** |
| Diabetes mellitus, N (%) | 32 (56.1) | 6 (22.2) | **0.004** |
| Dyslipidemia, N (%) | 31 (54.4) | 4 (14.8) | **0.001** |
| Smoking, N (%) | 20 (35.1) | 8 (29.6) | 0.620 |
| Chronic kidney disease, N (%) | 25 (43.9) | 4 (14.8) | **0.013** |
| Atrial fibrillation, N (%) | 18 (31.6) | 10 (37.0) | 0.620 |
| Previous stroke, N (%) | 3 (5.3) | 1 (3.7) | 1.000 |
| NT-proBNP, pg/mL | 444.0 (178.8-782.3) | 369.0 (110.3-577.5) | 0.206 |
| **NYHA class, N (%)** |  |  |  |
| II | 37 (64.9) | 19 (70.4) | 0.620 |
| III | 20 (35.1) | 8 (29.6) | 0.620 |
| **Medications, N (%)** |  |  |  |
| ACE inhibitor | 34 (59.6) | 20 (74.1) | 0.198 |
| ARB | 16 (28.1) | 8 (29.6) | 0.883 |
| Beta-blocker | 52 (91.2) | 26 (96.3) | 0.400 |
| Loop diuretics | 52 (91.2) | 24 (88.9) | 0.733 |
| Aldosterone antagonist | 29 (50.9) | 17 (63.0) | 0.299 |
| Amiodarone | 6 (10.5) | 6 (22.2) | 0.153 |
| **Transthoracic echocardiography** |  |  |  |
| LVEF, % | 32.8±4.2 | 32.7±3.9 | 0.921 |
| LVEDV, ml | 173.7±45.3 | 177.7±43.4 | 0.701 |
| LVESV ml | 115.5±34.9 | 110.6±38.0 | 0.560 |
| sPAP, mmHg | 37.4±8.0 | 37.0±7.3 | 0.885 |
| E/e’ ratio | 14.0 (11.0-17.0) | 14.5 (9.0-17.0) | 0.574 |
| **Planar Image analysis** |  |  |  |
| Late H/M | 1.43±0.19 | 1.46±0.19 | 0.427 |
| H/M Washout, % | 33.0 (25.5-47.0) | 41.0 (28.0-49.0) | 0.543 |
| Late L/M | 1.56±0.29 | 1.53±0.17 | 0.574 |
| L/M Washout, % | 32.0 (21.5-38.0) | 37.0 (29.0-48.0) | 0.019 |
| Late L/H | 1.10±0.24 | 1.05±0.16 | 0.323 |

Continuous normally distributed variables are expressed as mean ± SD. Categorical variables are n (%). Continuous non-normally distributed variables are median (interquartile range).

Abbreviations are reported in Table 1.

**Online Resource 6. Predictors of HF rehospitalization according to ischemic or non-ischemic etiology**

|  | **Ischemic etiology (N = 57)** | | | | | | **Non-ischemic etiology (N = 27)** | | | | | |
| --- | --- | --- | --- | --- | --- | --- | --- | --- | --- | --- | --- | --- |
|  | Univariate analysis | | | Multivariate analysis | | | Univariate analysis | | | Multivariate analysis | | |
|  | HR | 95% CI | p-value | HR | 95% CI | p-value | HR | 95% CI | p-value | HR | 95% CI | p-value |
| Age, yrs | 0.979 | 0.935-1.025 | 0.373 |  |  | - | 1.029 | 0.981-1.079 | 0.240 |  |  | - |
| Male sex | 0.535 | 0.156-1.836 | 0.320 |  |  | - | 0.279 | 0.036-2.191 | 0.225 |  |  | - |
| Height, cm | 0.979 | 0.915-1.047 | 0.537 |  |  | - | 0.994 | 0.928-1.065 | 0.858 |  |  | - |
| Weight, kg | 0.995 | 0.958-1.033 | 0.776 |  |  | - | 0.733 | 0.956-1.032 | 0.733 |  |  | - |
| BMI, kg/m2 | 1.021 | 0.919-1.134 | 0.702 |  |  | - | 0.984 | 0.918-1.054 | 0.640 |  |  | - |
| Hypertension | 2.316 | 0.942-5.697 | 0.067 |  |  | - | 0.753 | 0.229-2.479 | 0.640 |  |  | - |
| Diabetes mellitus | 1.203 | 0.518-2.792 | 0.667 |  |  | - | 1.537 | 0.444-5.313 | 0.497 |  |  | - |
| Dyslipidemia | 2.396 | 0.982-5.844 | 0.055 |  |  | - | 0.699 | 0.179-2.736 | 0.608 |  |  | - |
| Smoking | 1.589 | 0.618-4.084 | 0.336 |  |  | - | 2.016 | 0.467-8.704 | 0.347 |  |  | - |
| CKD | 1.237 | 0.529-2.891 | 0.624 |  |  | - | 1.543 | 0.320-7.443 | 0.589 |  |  | - |
| Atrial fibrillation | 1.656 | 0.704-3.892 | 0.248 |  |  | - | 2.964 | 0.883-9.952 | 0.079 |  |  | **-** |
| Previous stroke | 1.359 | 0.314-5.877 | 0.681 |  |  | - | 4.264 | 0.497-36.608 | 0.186 |  |  | - |
| NT-proBNP, pg/mL | 1.002 | 1.000-1.004 | **0.032** | 1.002 | 1.000-1.004 | **0.016** | 1.000 | 0.998-1.003 | 0.881 |  |  | - |
| NYHA II | 0.821 | 0.343-1.969 | 0.659 |  |  | - | 0.704 | 0.175-2.836 | 0.621 |  |  | - |
| NYHA III | 1.217 | 0.508-2.918 | 0.659 |  |  | - | 1.421 | 0.353-5.725 | 0.621 |  |  | - |
| ACE inhibitor | 0.698 | 0.291-1.676 | 0.421 |  |  | - | 0.352 | 0.107-1.155 | 0.085 |  |  | - |
| ARB | 0.551 | 0.229-1.324 | 0.183 |  |  | - | 1.083 | 0.315-3.728 | 0.899 |  |  | - |
| Beta-blocker | 0.419 | 0.140-1.256 | 0.120 |  |  | - | 0.370 | 0.045-3.028 | 0.354 |  |  | - |
| Loop diuretics | 0.358 | 0.048-2.680 | 0.317 |  |  | - | 0.041 | 0.000-427.425 | 0.499 |  |  | - |
| Aldosterone antagonist | 0.584 | 0.248-1.372 | 0.217 |  |  | - | 0.321 | 0.069-1.491 | 0.147 |  |  | - |
| Amiodarone | 0.482 | 0.162-1.432 | 0.189 |  |  | - | 2.598 | 0.332-20.357 | 0.363 |  |  | - |
| LVEF, % | 0.960 | 0.873-1.056 | 0.403 |  |  | - | 1.047 | 0.898-1.222 | 0.556 |  |  | - |
| LVEDV, ml | 0.999 | 0.990-1.009 | 0.885 |  |  | - | 1.008 | 0.993-1.024 | 0.277 |  |  | - |
| LVESV ml | 1.001 | 0.989-1.012 | 0.923 |  |  | - | 1.014 | 0.994-1.035 | 0.169 |  |  | - |
| sPAP, mmHg | 1.058 | 1.004-1.115 | **0.034** | 1.095 | 1.016-1.180 | **0.018** | 1.031 | 0.954-1.115 | 0.443 |  |  | - |
| E/e’ ratio | 1.074 | 0.961-1.201 | 0.209 |  |  | - | 1.149 | 0.959-1.380 | 0.138 |  |  | - |
| Late H/M* | 0.802 | 0.635-1.012 | 0.063 |  |  | - | 0.739 | 0.507-1.077 | 0.116 |  |  | - |
| H/M washout, % | 1.028 | 0.999-1.058 | 0.062 |  |  | - | 1.026 | 0.995-1.057 | 0.107 |  |  | - |
| Late L/M* | 1.285 | 1.046-1.578 | **0.017** |  |  | - | 1.119 | 0.790-1.586 | 0.527 |  |  | - |
| L/M washout, % | 1.011 | 0.983-1.040 | 0.449 |  |  | - | 0.997 | 0.954-1.042 | 0.893 |  |  | - |
| Late L/H* | 1.302 | 1.105-1.534 | **0.002** | 1.516 | 1.196-1.923 | **0.001** | 1.354 | 0.968-1.868 | 0.078 |  |  | - |

*Hazard ratio reflects risk with increases of 0.1.

Abbreviations are reported in Table 1 and 2.

**Online Resource 7. Predictors of cardiac death according to ischemic or non-ischemic etiology**

|  | **Ischemic etiology (N = 57)** | | | | | | **Non-ischemic etiology (N = 27)** | | | | | |
| --- | --- | --- | --- | --- | --- | --- | --- | --- | --- | --- | --- | --- |
|  | Univariate analysis | | | Multivariate analysis | | | Univariate analysis | | | Multivariate analysis | | |
|  | HR | 95% CI | p-value | HR | 95% CI | p-value | HR | 95% CI | p-value | HR | 95% CI | p-value |
| Age, yrs | 0.980 | 0.922-1.043 | 0.532 |  |  | - | 1.067 | 0.981-1.161 | 0.128 |  |  | - |
| Male sex | 1.528 | 0.197-11.843 | 0.685 |  |  | - | 0.310 | 0.062-1.536 | 0.151 |  |  | - |
| Height, cm | 1.007 | 0.923-1.100 | 0.870 |  |  | - | 0.923 | 0.852-1.000 | 0.051 |  |  | - |
| Weight, kg | 0.978 | 0.926-1.032 | 0.418 |  |  | - | 0.964 | 0.905-1.026 | 0.245 |  |  | - |
| BMI, kg/m2 | 0.975 | 0.871-1.090 | 0.653 |  |  | - | 1.026 | 0.893-1.178 | 0.719 |  |  | - |
| Hypertension | 1.420 | 0.310-6.500 | 0.651 |  |  | - | 1.825 | 0.334-9.978 | 0.488 |  |  | - |
| Diabetes mellitus | 0.911 | 0.286-2.905 | 0.875 |  |  | - | 1.774 | 0.324-9.699 | 0.508 |  |  | - |
| Dyslipidemia | 1.376 | 0.435-4.349 | 0.586 |  |  | - | 0.037 | 0.000-342.166 | 0.479 |  |  | - |
| Smoking | 1.703 | 0.461-6.299 | 0.425 |  |  | - | 2.482 | 0.289-21.283 | 0.407 |  |  | - |
| CKD | 1.073 | 0.340-3.390 | 0.940 |  |  | - | 1.487 | 0.172-12.833 | 0.718 |  |  | - |
| Atrial fibrillation | 1.087 | 0.327-3.617 | 0.892 |  |  | - | 4.545 | 0.825-25.038 | 0.082 |  |  | - |
| Previous stroke | 0.046 | 0.000-3120.733 | 0.587 |  |  | - | 0.047 | 0.000-1731081.789 | 0.730 |  |  | - |
| NT-proBNP, pg/mL | 1.000 | 0.998-1.002 | 0.846 |  |  | - | 1.002 | 0.999-1.005 | 0.260 |  |  | - |
| NYHA II | 0.711 | 0.225-2.251 | 0.562 |  |  | - | 0.322 | 0.064-1.608 | 0.167 |  |  | - |
| NYHA III | 1.406 | 0.444-4.448 | 0.562 |  |  | - | 3.108 | 0.622-15.534 | 0.167 |  |  | - |
| ACE inhibitor | 0.709 | 0.228-2.203 | 0.552 |  |  | - | 0.584 | 0.107-3.196 | 0.535 |  |  | - |
| ARB | 1.196 | 0.359-3.987 | 0.771 |  |  | - | 0.028 | 0.000-44.538 | 0.342 |  |  | - |
| Beta-blocker | 0.421 | 0.090-1.962 | 0.270 |  |  | - | 0.227 | 0.026-1.947 | 0.176 |  |  | - |
| Loop diuretics | 1.195 | 0.154-9.277 | 0.865 |  |  | - | 0.040 | 0.000-1280.938 | 0.543 |  |  | - |
| Aldosterone antagonist | 0.634 | 0.201-2.001 | 0.437 |  |  | - | 0.317 | 0.037-2.717 | 0.295 |  |  | - |
| Amiodarone | 3.747 | 1.004-13.978 | **0.049** |  |  | - | 0.033 | 0.000-100.625 | 0.404 |  |  | - |
| LVEF, % | 0.846 | 0.743-0.963 | **0.011** |  |  | - | 0.950 | 0.779-1.158 | 0.609 |  |  | - |
| LVEDV, ml | 1.019 | 1.006-1.032 | **0.004** |  |  | - | 1.007 | 0.988-1.026 | 0.495 |  |  | - |
| LVESV ml | 1.024 | 1.009-1.039 | **0.001** |  |  | - | 1.014 | 0.993-1.035 | 0.205 |  |  | - |
| sPAP, mmHg | 1.052 | 0.983-1.125 | 0.141 |  |  | - | 1.097 | 0.999-1.205 | 0.053 |  |  | - |
| E/e’ ratio | 1.198 | 1.031-1.391 | **0.018** | 1.278 | 1.030-1.586 | **0.026** | 1.033 | 0.855-1.249 | 0.736 |  |  | - |
| Late H/M* | 0.635 | 0.445-0.907 | **0.012** |  |  | - | 1.004 | 0.653-1.542 | 0.986 |  |  | - |
| H/M washout, % | 1.054 | 1.013-1.097 | **0.009** | 1.084 | 1.024-1.148 | **0.005** | 0.995 | 0.951-1.040 | 0.823 |  |  | - |
| Late L/M* | 1.274 | 1.008-1.612 | **0.043** |  |  | - | 1.106 | 0.660-1.851 | 0.703 |  |  | - |
| L/M washout, % | 1.032 | 0.992-1.074 | 0.116 |  |  | - | 0.950 | 0.879-1.027 | 0.198 |  |  | - |
| Late L/H* | 1.581 | 1.247-2.005 | **<0.001** | 1.571 | 1.089-2.268 | **0.016** | 1.077 | 0.636-1.827 | 0.782 |  |  | - |

*Hazard ratio reflects risk with increases of 0.1.

Abbreviations are reported in Table 1 and 2.

**Online Resource 8. Predictors of all-cause death according to ischemic or non-ischemic etiology**

|  | **Ischemic etiology (N = 57)** | | | | | | **Non-ischemic etiology (N = 27)** | | | | | |
| --- | --- | --- | --- | --- | --- | --- | --- | --- | --- | --- | --- | --- |
|  | Univariate analysis | | | Multivariate analysis | | | Univariate analysis | | | Multivariate analysis | | |
|  | HR | 95% CI | p-value | HR | 95% CI | p-value | HR | 95% CI | p-value | HR | 95% CI | p-value |
| Age, yrs | 1.002 | 0.949-1.058 | 0.939 |  |  | - | 1.058 | 0.987-1.134 | 0.111 |  |  | - |
| Male sex | 24.611 | 0.037-16375.112 | 0.334 |  |  | - | 0.294 | 0.073-1.180 | 0.084 |  |  | - |
| Height, cm | 0.973 | 0.930-1.019 | 0.247 |  |  | - | 0.980 | 0.928-1.034 | 0.454 |  |  | - |
| Weight, kg | 1.030 | 0.958-1.107 | 0.428 |  |  | - | 0.923 | 0.852-1.000 | 0.051 |  |  | - |
| BMI, kg/m2 | 0.937 | 0.878-0.999 | **0.046** |  |  | - | 1.026 | 0.893-1.178 | 0.719 |  |  | - |
| Hypertension | 1.184 | 0.337-4.164 | 0.792 |  |  | - | 1.538 | 0.367-6.441 | 0.556 |  |  | - |
| Diabetes mellitus | 1.169 | 0.422-3.243 | 0.764 |  |  | - | 3.867 | 0.954-15.671 | 0.058 |  |  | - |
| Dyslipidemia | 1.665 | 0.604-4.594 | 0.325 |  |  | - | 0.036 | 0.000-85.055 | 0.402 |  |  | - |
| Smoking | 2.391 | 0.681-8.396 | 0.174 |  |  | - | 3.598 | 0.442-29.301 | 0.231 |  |  | - |
| CKD | 1.684 | 0.626-4.532 | 0.302 |  |  | - | 2.585 | 0.518-12.897 | 0.247 |  |  | - |
| Atrial fibrillation | 1.341 | 0.487-3.694 | 0.570 |  |  | - | 4.050 | 0.959-17.108 | 0.057 |  |  | - |
| Previous stroke | 1.185 | 0.156-8.985 | 0.870 |  |  | - | 0.046 | 0.000-120112.012 | 0.684 |  |  | - |
| NT-proBNP, pg/mL | 1.000 | 0.999-1.001 | 0.903 |  |  | - | 1.001 | 0.998-1.003 | 0.522 |  |  | - |
| NYHA II | 0.636 | 0.236-1.710 | 0.370 |  |  | - | 0.302 | 0.075-1.220 | 0.093 |  |  | - |
| NYHA III | 1.573 | 0.585-4.230 | 0.370 |  |  | - | 3.310 | 0.820-13.365 | 0.093 |  |  | - |
| ACE inhibitor | 1.171 | 0.425-3.225 | 0.760 |  |  | - | 0.472 | 0.113-1.982 | 0.305 |  |  | - |
| ARB | 1.112 | 0.386-3.207 | 0.844 |  |  | - | 0.330 | 0.041-2.683 | 0.300 |  |  | - |
| Beta-blocker | 0.624 | 0.141-2.762 | 0.534 |  |  | - | 0.276 | 0.033-2.299 | 0.234 |  |  | - |
| Loop diuretics | 1.575 | 0.208-11.954 | 0.660 |  |  | - | 1.107 | 0.136-9.025 | 0.924 |  |  | - |
| Aldosterone antagonist | 2.461 | 0.880-6.878 | 0.086 |  |  | - | 1.945 | 0.392-9.651 | 0.416 |  |  | - |
| Amiodarone | 2.501 | 0.709-8.818 | 0.154 |  |  | - | 0.032 | 0.000-31.928 | 0.329 |  |  | - |
| LVEF, % | 0.906 | 0.812-1.011 | 0.078 |  |  | - | 1.038 | 0.866-1.244 | 0.688 |  |  | - |
| LVEDV, ml | 1.019 | 1.007-1.030 | **0.001** |  |  | - | 1.004 | 0.988-1.021 | 0.604 |  |  | - |
| LVESV ml | 1.022 | 1.009-1.035 | **0.001** | 1.018 | 1.004-1.032 | **0.011** | 1.009 | 0.991-1.028 | 0.314 |  |  | - |
| sPAP, mmHg | 1.037 | 0.978-1.099 | 0.225 |  |  | - | 1.070 | 0.988-1.160 | 0.096 |  |  | - |
| E/e’ ratio | 1.114 | 0.981-1.265 | 0.097 |  |  | - | 1.065 | 0.903-1.256 | 0.453 |  |  | - |
| Late H/M* | 0.712 | 0.532-0.954 | **0.023** |  |  | - | 0.847 | 0.562-1.277 | 0.428 |  |  | - |
| H/M washout, % | 1.038 | 1.005-1.073 | **0.025** |  |  | - | 1.013 | 0.977-1.051 | 0.481 |  |  | - |
| Late L/M* | 1.172 | 0.958-1.434 | 0.123 |  |  | - | 1.286 | 0.861-1.919 | 0.219 |  |  | - |
| L/M washout, % | 1.030 | 0.995-1.066 | 0.089 |  |  | - | 0.979 | 0.924-1.037 | 0.476 |  |  | - |
| Late L/H* | 1.366 | 1.118-1.670 | **0.002** | 1.228 | 1.012-1.490 | **0.038** | 1.402 | 0.928-2.118 | 0.109 |  |  | - |

*Hazard ratio reflects risk with increases of 0.1.

Abbreviations are reported in Table 1 and 2.

**Online Resource 9. Baseline characteristics according to the gender**

| **Variables** | **Male**  **(N = 71)** | **Female**  **(N = 13)** | **p-value** |
| --- | --- | --- | --- |
| Age, yrs | 66.0 (57.0-75.0) | 72.0 (64.5-74.5) | 0.255 |
| Height, cm | 168.4±6.2 | 155.7±5.1 | **<0.001** |
| Weight, kg | 78.0 (70.0-85.0) | 71.5 (59.3-75.8) | **0.014** |
| BMI, kg/m2 | 26.3±6.8 | 28.4±3.6 | 0.299 |
| Hypertension, N (%) | 51 (71.8) | 9 (69.2) | 0.849 |
| Diabetes mellitus, N (%) | 32 (45.1) | 6 (46.2) | 0.942 |
| Dyslipidemia, N (%) | 33 (46.5) | 2 (15.4) | 0.063 |
| Smoking, N (%) | 26 (36.6) | 2 (15.4) | 0.203 |
| Chronic kidney disease, N (%) | 24 (33.8) | 5 (38.5) | 0.745 |
| Atrial fibrillation, N (%) | 22 (31.0) | 6 (46.2) | 0.286 |
| Previous stroke, N (%) | 4 (5.6) | 0 | 1.000 |
| Ischemic etiology, N (%) | 50 (70.4) | 7 (53.8) | 0.239 |
| Non-ischemic etiology, N (%) | 21 (29.6) | 6 (46.2) | 0.239 |
| NT-proBNP, pg/mL | 416.0 (182.5-770.0) | 112.0 (39.0-627.0) | 0.146 |
| **NYHA class, N (%)** |  |  |  |
| II | 47 (66.2) | 9 (69.2) | 0.831 |
| III | 24 (33.8) | 4 (30.8) | 1.000 |
| **Medications, N (%)** |  |  |  |
| ACE inhibitor | 46 (64.8) | 8 (61.5) | 0.822 |
| ARB | 20 (28.2) | 4 (30.8) | 1.000 |
| Beta-blocker | 66 (93.0) | 12 (92.3) | 0.933 |
| Loop diuretics | 64 (90.1) | 12 (92.3) | 0.807 |
| Aldosterone antagonist | 39 (54.9) | 7 (53.8) | 0.942 |
| Amiodarone | 11 (15.5) | 1 (7.7) | 0.681 |
| **Transthoracic echocardiography** |  |  |  |
| LVEF, % | 32.8±4.1 | 32.5±4.2 | 0.803 |
| LVEDV, ml | 180.2±44.4 | 146.6±33.7 | **0.012** |
| LVESV ml | 116.9±36.6 | 97.8±26.8 | 0.076 |
| sPAP, mmHg | 36.9±7.4 | 41.1±9.1 | 0.072 |
| E/e’ ratio | 14.0 (10.8-17.0) | 15.5 (10.5-17.8) | 0.343 |
| **Planar Image analysis** |  |  |  |
| Late H/M | 1.44±0.18 | 1.46±0.21 | 0.771 |
| H/M Washout, % | 35.0 (26.0-48.0) | 29.0 (25.5-48.5) | 0.902 |
| Late L/M | 1.56±0.28 | 1.52±0.18 | 0.602 |
| L/M Washout, % | 32.0 (23.0-42.0) | 29.0 (25.5-49.0) | 0.757 |
| Late L/H | 1.09±0.23 | 1.05±0.15 | 0.527 |

Continuous normally distributed variables are expressed as mean ± SD. Categorical variables are n (%). Continuous non-normally distributed variables are median (interquartile range).

Abbreviations are reported in Table 1
